# Supplementary material for: Involvement of ethylene biosynthesis and signalling in fruit set and early fruit development in zucchini squash (Cucurbita pepo L.)
Source: PubMed Central journal article supplement (PMC3856489; doi:10.1186/1471-2229-13-139), 2013-09-22
Supplement: 1471-2229-13-139-S1.pdf [file 1471-2229-13-139-S1.pdf]

**Table S1. List of genes and q-PCR primers analysed in this paper. Putative orthologs in melon and cucumber are indicated.**

| Gene <sup>1</sup> | Reference Accession number | Q-PCR primer sequences                                    | Melon Gene <sup>2</sup>                                                                 | Cucumber Gene <sup>3</sup>                                      |
|-------------------|----------------------------|-----------------------------------------------------------|-----------------------------------------------------------------------------------------|-----------------------------------------------------------------|
| <i>I8S</i>        | [9]<br>AF206895            | CCGTTGCTCTGATGATTCATGA<br>GTTGATAGGGCAGAAATTTGAATGAT      |                                                                                         |                                                                 |
| <i>ACTINE</i>     | [31]<br>HM594170           | CCTCTCAATCCCAAAGCTAACAG<br>CGGCCTGGATAGCAACATACA          |                                                                                         |                                                                 |
| <i>CpACS1</i>     | [14]<br>AAA33113           | TGTCACTGAGCCAGGTTGGTT<br>GCAACGTCAACGGTGTGTC              | MELO3C021182, evaluate 0.0<br><br>CM3.5_scaffold00047<br>(319.775-323.449) LGXI         | Csa6M006800, evaluate 0.0<br><br>Chr6 (576.828-580.112)         |
| <i>CpACS2</i>     | [26]<br>CUTC0483191        | ACAAGGAGGTAGCCAAGGTTAAG<br>CCCACGACTCAGTTAAACTTTTG        | MELO3C016340, evaluate 7e-66<br><br>CM3.5_scaffold00027<br>(3.936.912 -3.939.367) LGVII | Csa4M049610, evaluate 2e-62<br><br>Chr4 (3.925.814-3.928.351)   |
| <i>CpACS4</i>     | [26]<br>CUTC036131         | CAGCAGCTTCTCCATAATTCTA<br>CGTTAATGAATACCTGGAGACGA         | MELO3C006840, evaluate 0.0<br><br>CM3.5_scaffold00006<br>(6.529.439-6.532.788) LGVI     | Csa3M177920, evaluate e-176<br><br>Chr3 (12.070.103-2.073.483)  |
| <i>CpACS5</i>     | [26]<br>CUTC0383771        | TGTGCATCTGAAAGCATAGAAGA<br>TTAGAAGATAGCGACCGAGACAG        | MELO3C005597, evaluate 0.0<br><br>CM3.5_scaffold00005<br>(6.337.710-6.340.825) LGIX     | Csa5M157380, evaluate 0.0<br><br>Chr5 (5.575.539-5.578.435)     |
| <i>CpACS6</i>     | [26]<br>CUTC0406831        | GAAACCAGCTACCAAGAGAAACA<br>TTTTCGTTTCAAGAGTAGATTGC        | MELO3C005597, evaluate e-122<br><br>CM3.5_scaffold00005<br>(6.337.710-6.340.825) LGIX   | Csa5M157380, evaluate e-115<br><br>Chr5 (5.575.539-5.578.435)   |
| <i>CpACS7</i>     | This paper<br>KC662095     | GGTTTAGAGTCGGAGCGATTTAT<br>CTCTACCAGCATTTTCTGTCTT         | MELO3C019008, evaluate 1e-69<br><br>CM3.5_scaffold00035<br>(3.114.060-3.115.032) LGVII  | Csa4M099220, evaluate e-122<br><br>Chr4 (6.483.187-6.484.884)   |
| <i>CpACO1</i>     | unpublished<br>HQ847860    | CATTTGGGACAAAAGTGAGTAACTAC<br>GCTCGGAGACCCTTGATCAA        | MELO3C014437, evaluate 0.0<br><br>CM3.5_scaffold00022<br>(3.015.704-3.017.224) LGV      | Csa6M421630, evaluate 0.0<br><br>Chr6 (19.435.577-19.436.822)   |
| <i>CpETRI</i>     | unpublished<br>JX014243    | AAAGGAGAGCTGCCTGAGAGTC<br>CACGACGCTCTATAAGTTCCGA          | MELO3C003906, evaluate 0.0<br><br>CM3.5_scaffold00003<br>(56.561-62.893) LGV            | Csa2M070880, evaluate 8e-65<br><br>Chr2 (5.520.557-5.526.964)   |
| <i>CpERS1</i>     | unpublished<br>JX014245    | GAGCGTCGGGTTCTATTCGA<br>AACCTGGGATATGCCTTGTATGTTAC        | MELO3C003906, evaluate 3e-93<br><br>CM3.5_scaffold00003<br>(56.561-62.893) LGV          | Csa2M070880, evaluate 3e-86<br><br>Chr2 (5.520.557-5.526.964)   |
| <i>CpCTR1</i>     | [9]<br>FJ917748            | ACTAATGATTAGTTGTGGCTGGATACA<br>AACAGTAATGACATTTCTAGCAAACA | MELO3C009433, evaluate 0.0<br><br>CM3.5_scaffold00011<br>(2.117.162-2.125.790) LGIV     | Csa3M749850, evaluate e-164<br><br>Chr3 (29.127.592-29.136.084) |
| <i>CpCTR2</i>     | [9]<br>FJ917749            | ACGTGTTGCTTGGCTGTTAC<br>TCACTCATGAGTACTGGTTGATTGA         | MELO3C009433, evaluate 1e-27<br><br>CM3.5_scaffold00011<br>(2.117.162-2.125.790) LGIV   | Csa3M749850, evaluate e-164<br><br>Chr3 (29.127.592-29.136.084) |
| <i>CpEIN3.1</i>   | This paper<br>KC620381     | GCCATCAAATGTTTACAAGACCG<br>AATGAAAAGAGTGCAAGCAGTCTTAC     | MELO3C015633, evaluate 3e-31<br><br>CM3.5_scaffold00025<br>(3.608.957-3.612.634)        | Csa1M601520, evaluate 2e-22<br><br>Chr1 (23.382.449-23.384.803) |
| <i>CpEIN3.2</i>   | This paper<br>KC620382     | TAGCAGCCAATTCAACCAGTTTAAGCC<br>CGGTAAAGCATCGAATTGAGATCAGG | MELO3C019008, evaluate 1e-69<br><br>CM3.5_scaffold00035<br>(3.114.060-3.115.032) LGVII  | Csa1M601520, evaluate 3e-34<br><br>Chr1 (23.382.449-23.384.803) |

<sup>1</sup> *Cucurbita pepo* unigenes available at <http://www.cucurbitgene.net><sup>2</sup> Best hits of *C. pepo* genes in <https://melonomics.net/>, database that holds the recently released sequence of the melon genome [47]. Position in the melon genome and in the melon genetic map of each melon unigenes is indicated<sup>3</sup> Best hits of *C. pepo* genes in <http://www.icugi.org/cgi-bin/ICuGI/index.cgi>, database that holds the last version of the cucumber genome. Position in the cucumber genome of each gen is indicated [48].
