# Supplementary material for: Involvement of ethylene biosynthesis and signalling in fruit set and early fruit development in zucchini squash (Cucurbita pepo L.)
Source: PubMed Central journal article supplement (PMC3856489; doi:10.1186/1471-2229-13-139), 2013-09-22
Supplement: 1471-2229-13-139-S2.pdf [file 1471-2229-13-139-S2.pdf]

A

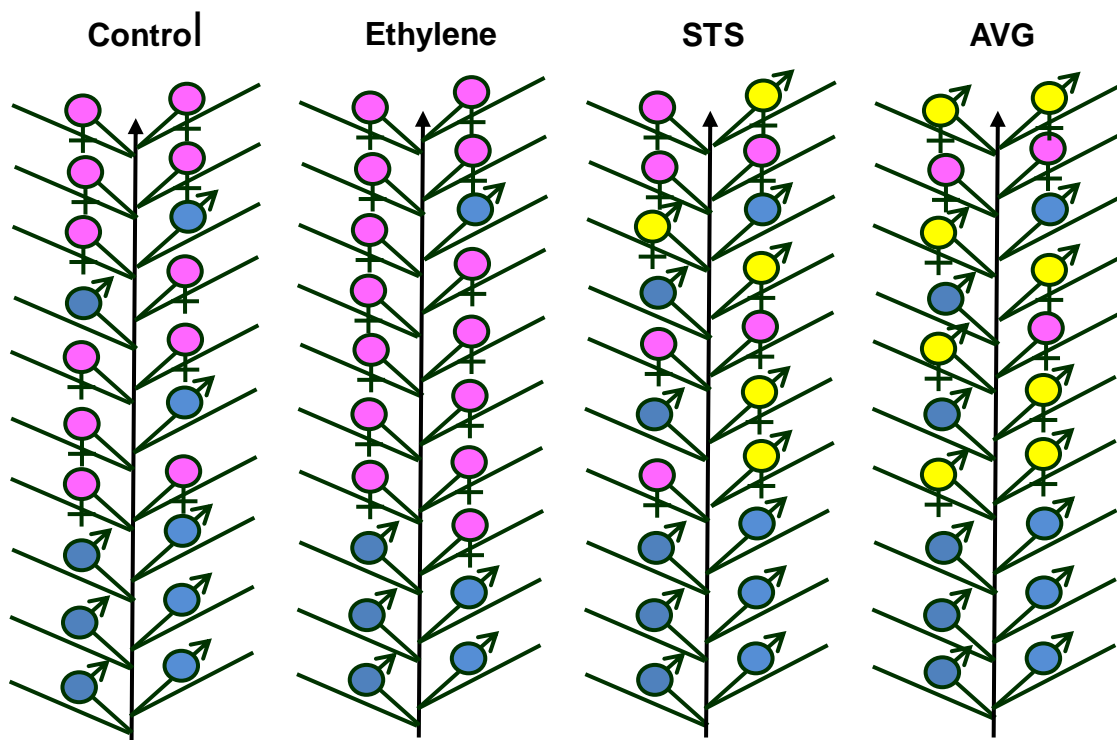

B

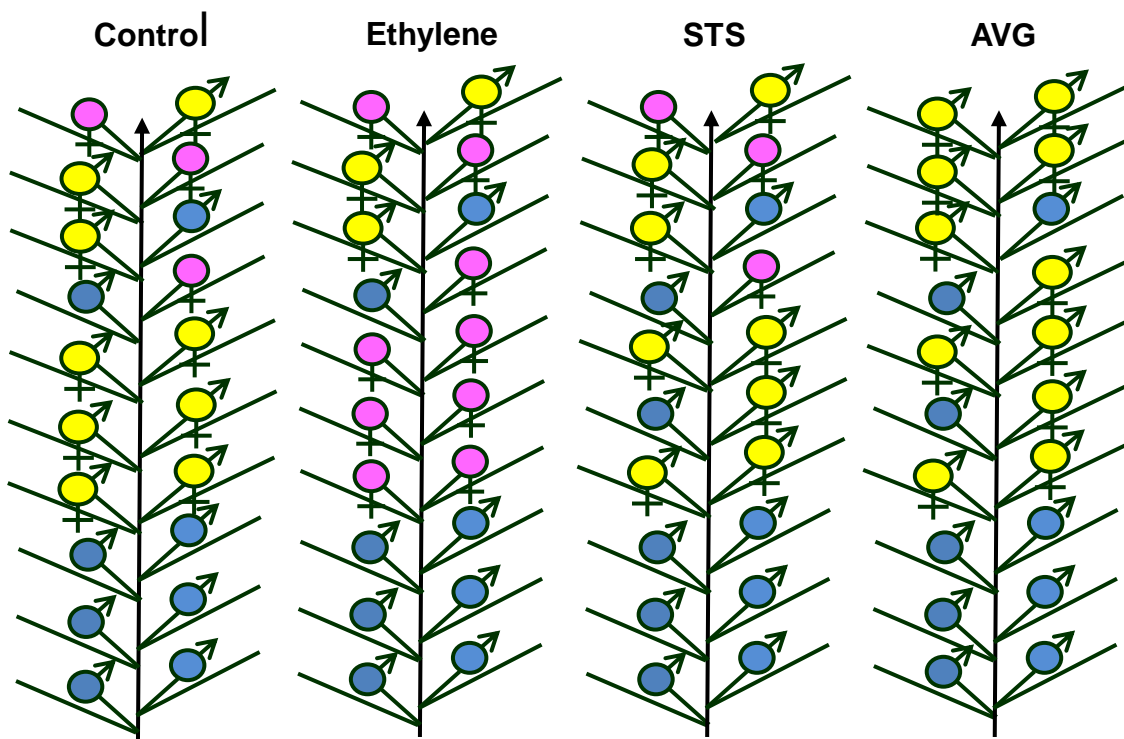

Figure S1: Effect of treatments with ethephon and ethylene inhibitors AVG and STS on sexual expression and parthenocarpity in the cultivars Tosca (A) and Cavili (B). Pink, female flowers; blue, male flowers; yellow, bisexual parthenocarpic flowers.
